# Supplementary material for: Modification of the 8th American Joint Committee on Cancer staging system for gallbladder carcinoma to improve prognostic precision
Source: PubMed Central journal article supplement (PMC7682115; doi:10.1186/s12885-020-07578-7), 2020-11-23

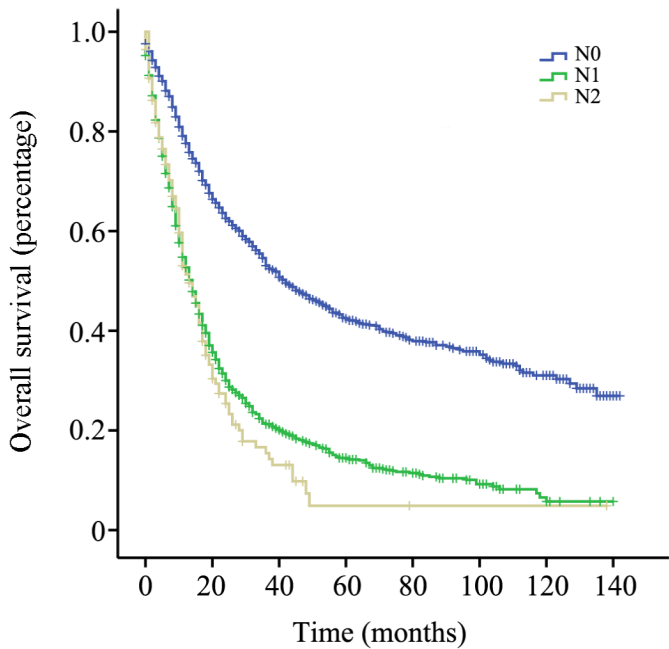

Supplement: 12885_2020_7578_MOESM1_ESM.pdf [file 12885_2020_7578_MOESM1_ESM.pdf]
